# Supplementary material for: Yield and Physicochemical Properties of Soluble Dietary Fiber Extracted from Untreated and Steam Explosion-Treated Black Soybean Hull
Source: Hindawi journal article supplement (doi:10.1155/2019/9736479), 2019-12-12
Supplement: f1 [file 9736479.f1.zip]

Archive with 7 entries (7 files):
- 9736479.f1/Binding capacity of black soybean hull SDF for cholesterol in egg yolk.xls
- 9736479.f1/Cellulose, Hemicellulose and Lignose Contents and physical and chemical prope.xls
- 9736479.f1/Contents of monosaccharides of black soybean hull SDF before and after modification.xls
- 9736479.f1/Molecular weight determination results of black soybean hull SDF.xls
- 9736479.f1/SE SDF SEM.jpg
- 9736479.f1/Single factor analysis.xlsx
- 9736479.f1/Untreated SDF SEM.jpg
