# Supplementary material for: Yield and Physicochemical Properties of Soluble Dietary Fiber Extracted from Untreated and Steam Explosion-Treated Black Soybean Hull
Source: Hindawi journal article supplement (doi:10.1155/2019/9736479), 2019-12-12
Supplement: f1 [file 9736479.f1.zip › 9736479.f1/Binding capacity of black soybean hull SDF for cholesterol in egg yolk.xls]

## Sheet: Sheet1
	untreated			SE
	pH=2	pH=7		pH=2	pH=7
	8.53	9.35		13.54	15.31
	8.79	9.39		13.59	15.38
	8.65	9.27		13.46	15.36
average	8.65667	9.33667		13.53	15.35
stdev	0.130128	0.061101		0.0655744	0.0360555
t-test	5.31837e-07	1.29129e-08
	**	**
