# Supplementary material for: Yield and Physicochemical Properties of Soluble Dietary Fiber Extracted from Untreated and Steam Explosion-Treated Black Soybean Hull
Source: Hindawi journal article supplement (doi:10.1155/2019/9736479), 2019-12-12
Supplement: f1 [file 9736479.f1.zip › 9736479.f1/Cellulose, Hemicellulose and Lignose Contents and physical and chemical prope.xls]

## Sheet: Physical and chemical propertie
Physical and chemical properties of black soybean hull before and after modification
	WHC (g/g)	SC (mL/g)	WBC (g/g)	OHC (g/g)
SE BSH	4.2	4.85	7.02	2.56
	3.92	4.65	7.46	2.94
	4.06	4.75	7.24	2.75
average	4.06	4.75	7.24	2.75
stdev	0.14	0.1	0.22	0.19
	0.080829	0.057735	0.127017	0.109697
Untreated BSH	3.33	2.16	3.21	2.49
	3.49	1.84	3.47	2.75
	3.41	2	3.34	2.62
average	3.41	2	3.34	2.62
stdev	0.08	0.16	0.13	0.13
	0.046188	0.092376	0.0750555	0.0750555
SE-Untreated BSH t-TEST	0.00221324	1.462e-05	1.21715e-05	0.383423
	**	**	**

## Sheet: Cellulose, Hemicellulose 
	Cellulose (%)	Hemicellulose (%)	Lignose (%)
Untreated BSH	23.89	15.94	19.92
	24.66	16.33	20.33
	24.86	16.75	20.29
AVERAGE	24.47	16.34	20.18
STDEV	0.512152	0.405093	0.226053
	0.295691	0.23388	0.130512
SE BSH	22.12	12.86	15.92
	22.09	13.24	16.34
	21.97	12.87	17.06
AVERAGE	22.06	12.99	16.44
STDEV	0.0793725	0.216564	0.576541
	0.0458258	0.125033	0.332866
t-TEST	0.00129029	0.000226133	0.000472004
	**	**	**
