# Supplementary material for: Yield and Physicochemical Properties of Soluble Dietary Fiber Extracted from Untreated and Steam Explosion-Treated Black Soybean Hull
Source: Hindawi journal article supplement (doi:10.1155/2019/9736479), 2019-12-12
Supplement: f1 [file 9736479.f1.zip › 9736479.f1/Contents of monosaccharides of black soybean hull SDF before and after modification.xls]

## Sheet: Sheet1
	Standrad substance
	Concentration ug/ml	Fuc	Ara	Gal	Glc	Xyl	Man	Fru	Rib	Gal-AC	Glc-AC
	1	1.81326	0	1.10537	4.09575	0.84717	2.14981	0	0	0	0
	5	29.535	20.9566	16.1823	10.3661	14.7195	11.4732	4.0686	12.5679	3.86088	3.3785
	10	8.52974	9.94205	9.72726	7.13809	9.79651	8.58838	4.16023	15.1199	8.48411	6.14561
	15	11.391	13.8817	13.5391	10.2078	13.641	12.0385	6.3169	20.8308	13.4477	9.3158
	20	14.4727	17.8602	17.6237	13.5438	16.9584	15.2042	8.58864	27.8522	18.4612	12.4751
	25	16.7295	21.0757	21.1696	16.7362	20.1334	18.1984	11.1567	33.6838	24.4342	16.1856
	30	18.684	24.0242	24.5745	19.6179	22.4527	20.4954	13.7106	39.2725	30.3449	20.0436
	35	20.1098	26.4483	27.4267	22.4453	24.6827	22.7243	16.0031	44.2616	36.5536	24.6657
	40	21.5277	28.4233	29.9154	24.8785	26.2945	24.1276	18.3294	48.7802	43.3227	29.4804
	45	22.8705	30.3584	31.9796	26.7558	27.4765	25.3684	20.448	53.0688	49.9626	34.7698
	50	24.4693	32.552	34.183	29.1525	28.609	26.5328	22.5557	56.6446	57.0416	40.8698
	55	25.6152	34.0592	35.8676	30.6795	29.4957	27.297	24.4371	59.9146	63.6146	46.7458
	60	27.2394	35.6553	37.596	32.6186	30.3277	27.8138	26.0768	62.8508	71.2904	53.5003
		Fuc	Ara	Gal	Glc	Xyl	Man	Fru	Rib	Gal-AC	Glc-AC
	SE	1.28973	10.2142	29.2287	3.94218	3.10579	27.1537	0	0	18.5572	1.06172
	Untreated	0.618574	3.99019	36.9357	6.46674	0.7926	39.4587	0	0	5.75468	1.91987
					Fuc
					0	0
					1	0.84717
					10	9.79651
						Xyl
					0	0
					1	0.84717
					10	9.79651
					15	13.641
					20	16.9584
Y=ax+b				Peak area		Concentration ug/mL		Monosaccharide content (mg/g)
a	b			SE	Untreated	SE	Untreated	SE	Untreated
0.9855	-0.0655	Fuc		1.28973	0.618574	1.37517	0.694139	5.50068	2.77656
0.6639	3.9353	Ara		10.2142	3.99019	9.45767	0.0826851	37.8307	0.33074
0.385	14.659	Gal		29.2287	36.9357	37.8435	57.8616	151.374	231.446
0.6169	1.0678	Glc		3.94218	6.46674	4.6594	8.75172	18.6376	35.0069
0.8691	0.253	Xyl		3.10579	0.7926	3.28247	0.620872	13.1299	2.48349
0.2064	15.84	Man		27.1537	39.4587	54.8144	114.432	219.258	457.727
0.4798	-0.8059	Fru		0	0
1.1213	5.2642	Rib		0	0
