# Supplementary material for: Yield and Physicochemical Properties of Soluble Dietary Fiber Extracted from Untreated and Steam Explosion-Treated Black Soybean Hull
Source: Hindawi journal article supplement (doi:10.1155/2019/9736479), 2019-12-12
Supplement: f1 [file 9736479.f1.zip › 9736479.f1/Molecular weight determination results of black soybean hull SDF.xls]

## Sheet: Untreated
									Molar mass (g/mol)	Peak1
									Mn	4.386×104 (±9.485%)
									Mp	2.099×105 (±0.788%)
									Mv	n/a
									Mw	2.815×105 (±0.899%)
									Mz	5.731×106 (±2.290%)
									Polydispersity	Peak1
									Mw/Mn	6.417 (±9.527%)
									Mz/Mn	130.662 (±9.757%)
									R.M.S.	Peak1
									Rn	n/a
									Rw	n/a
									Rz	36.6 (±5.9%)

## Sheet: SE
									Molar mass (g/mol)	Peak1
									Mn	4.886×104 (±4.162%)
									Mp	1.819×104 (±5.341%)
									Mv	n/a
									Mw	1.478×105 (±1.319%)
									Mz	6.619×105 (±2.465%)
									Polydispersity	Peak1
									Mw/Mn	3.025 (±4.366%)
									Mz/Mn	13.548 (±4.838%)
									R.M.S.	Peak1
									Rn	17.3 (±120.5%)
									Rw	16.6 (±81.0%)
									Rz	24.1 (±19.3%)
