# Supplementary material for: Yield and Physicochemical Properties of Soluble Dietary Fiber Extracted from Untreated and Steam Explosion-Treated Black Soybean Hull
Source: Hindawi journal article supplement (doi:10.1155/2019/9736479), 2019-12-12
Supplement: f1 [file 9736479.f1.zip › 9736479.f1/Single factor analysis.xlsx]

## Sheet: Pressure
	Pressure（Mpa）
	0.25	0.5	0.75	1	1.25	1.5
SDF extraction ratio(%)	14.29	15.92	16.91	17.12	15.12	14.89
	14.36	15.89	16.85	17.05	15.2	14.83
	14.26	15.77	16.81	17.18	15.13	14.78
Average	14.3033	15.86	16.8567	17.1167	15.15	14.8333
Stdev	0.051316	0.0793725	0.0503322	0.0650641	0.043589	0.0550757
	0.0296273	0.0458258	0.0290593	0.0375648	0.0251661	0.031798
t-检验		0.25-0.5	025-0.75	0.25-1.0	0.25-1.25	0.25-1.5
		8.98677e-06	4.1796e-07	5.00817e-07	2.62915e-05	0.00025956
		**	**	**	**	**
			0.5-0.75	0.5-1.0	0.5-1.25	0.5-1.5
			5.16921e-05	2.92247e-05	0.000170202	5.12586e-05
			**	**	**	**
				0.75-1.0	0.75-1.25	0.75-1.5
				0.0054181	1.53924e-06	1.2289e-06
				**	**	**
					1.0-1.25	1.0-15
					1.67051e-06	1.29109e-06
					**	**
						1.25-1.5
						0.00145122
						**

## Sheet: Time
		Time(s)
		20	40	60	80	100	120
	SDF extraction ratio(%)	15.09	16.15	16.52	17.13	16.89	16.16
		15.16	16.05	16.4	17.06	16.8	16.08
		15.19	15.96	16.35	16.95	16.7	16.02
	Average	15.1467	16.0533	16.4233	17.0467	16.7967	16.0867
	Stdev	0.051316	0.0950438	0.0873689	0.0907377	0.0950438	0.0702377
		0.0296273	0.0548736	0.0504425	0.0523874	0.0548736	0.0405518
		a	b	c	d	e	bf
	t-检验		20-40	20-60	20-80	20-100	20-120
			0.000130148	2.60857e-05	6.0005e-06	1.21267e-05	4.79719e-05
			**	**	**	**	**
				40-60	40-80	40-100	40-120
				0.00768382	0.000196446	0.000663766	0.650746
				**	**	**
					60-80	60-100	60-120
					0.00101761	0.00744402	0.00650826
					**	**	**
						80-100	80-120
						0.0300653	0.00013186
						*	**
							100-120
							0.000481708
							**

## Sheet: Humidity
	9	11	13	15	17	19
SDF extraction ratio(%)	16.31	16.78	16.89	17.09	16.65	16.31
	16.23	16.71	16.79	17.15	16.56	16.29
	16.39	16.86	16.82	17.03	16.51	16.38
Average	16.31	16.7833	16.8333	17.09	16.5733	16.3267
Stdev	0.08	0.0750555	0.051316	0.06	0.070946	0.0472582
	0.046188	0.0433333	0.0296273	0.034641	0.0409607	0.0272845
	a	b	ac	d	e	af
t-检验		9-11.	9-13.	9-15.	9-17.	9-19.
		0.00171347	0.000675012	0.000173713	0.0129955	0.771556
		**	**	**	*
			11-13.	11-15.	11-17.	11-19.
			0.394781	0.00523221	0.0244102	0.000874052
				**	**	**
				13-15	13-17	13-19
				0.00489393	0.00677641	0.000229829
				**	**	**
					15-17	15-19
					0.000649888	6.53559e-05
					**	**
						17-19
						0.00742763
						**
