# Supplementary figures and images for: Yield and Physicochemical Properties of Soluble Dietary Fiber Extracted from Untreated and Steam Explosion-Treated Black Soybean Hull
Source: Hindawi journal article supplement (doi:10.1155/2019/9736479), 2019-12-12

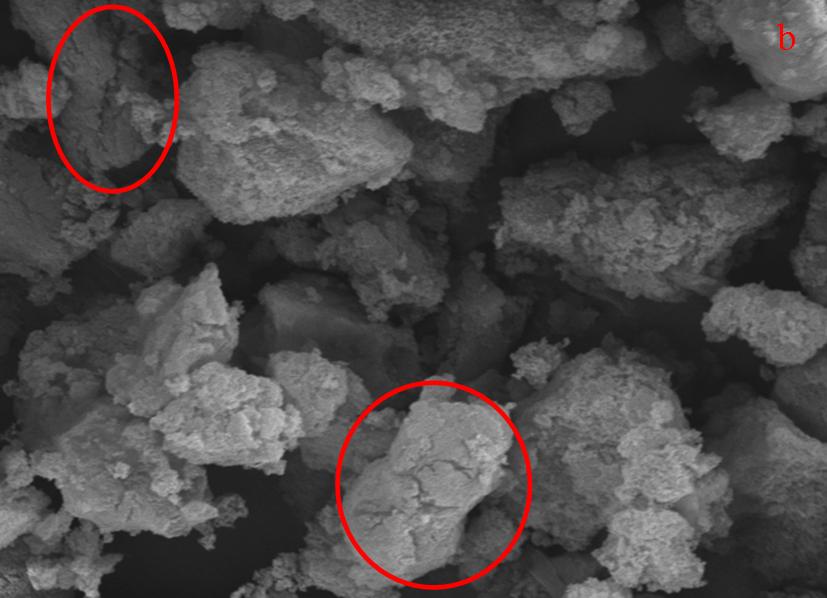

Supplement: f1 [file 9736479.f1.zip › 9736479.f1/SE SDF SEM.jpg]

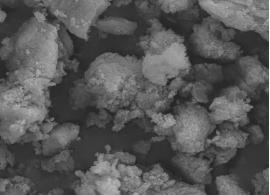

Supplement: f1 [file 9736479.f1.zip › 9736479.f1/Untreated SDF SEM.jpg]
